# Supplementary material for: Ammonium-directed dihydroxylation of 3-aminocyclohex-1-enes: development of a metal-free dihydroxylation protocol
Source: Royal Society of Chemistry journal article supplement (doi:10.1039/b808811j), 2008-01-01
Supplement: b808811j-1.pdf [file b808811j-1.pdf]

## Supplementary Information

### Ammonium-directed dihydroxylation of 3-aminocyclohex-1-enes: development of a metal-free dihydroxylation protocol

Caroline Aciro,<sup>a</sup> Timothy D. W. Claridge,<sup>a</sup> Stephen G. Davies,<sup>a\*</sup> Paul M. Roberts,<sup>a</sup> Angela J. Russell<sup>a,b</sup> and James E. Thomson<sup>a</sup>

<sup>a</sup> *Department of Chemistry, Chemistry Research Laboratory, University of Oxford, Mansfield Road, Oxford, OX1 3TA, UK.*

<sup>b</sup> *Department of Pharmacology, University of Oxford, Mansfield Road, Oxford, OX1 3QT, UK.*

E-mail: steve.davies@chem.ox.ac.uk

### Experimental

#### General Experimental

Water was purified by an Elix<sup>®</sup> UV-10 system. *m*CPBA was supplied as a 70-77% slurry in water (Aldrich) and titrated according to the procedure of Swern<sup>1</sup> immediately before use. All other solvents were used as supplied (analytical or HPLC grade) without prior purification. Organic layers were dried over MgSO<sub>4</sub>. Thin layer chromatography was performed on aluminium plates coated with 60 F<sub>254</sub> silica. Plates were visualised using UV light (254 nm), iodine, 1% aq KMnO<sub>4</sub>, or 10% ethanolic phosphomolybdic acid. Flash column chromatography was performed either on Kieselgel 60 silica on a glass column, or on a Biotage SP4 automated flash column chromatography platform.

Melting points were recorded on a Gallenkamp Hot Stage apparatus and are uncorrected. IR spectra were recorded on a Bruker Tensor 27 FT-IR spectrometer as either a thin film on NaCl plates (film) or a KBr disc (KBr), as stated. Selected characteristic peaks are reported in cm<sup>-1</sup>. NMR spectra were recorded on Bruker Avance spectrometers in the deuterated solvent stated. The field was locked by external referencing to the relevant deuterium resonance. Low-resolution mass spectra were recorded on either a VG MassLab 20-250 or a Micromass Platform 1 spectrometer. Accurate mass measurements were run on either a Bruker MicroTOF internally calibrated with polyalanine, or a Micromass GCT instrument fitted with a Scientific Glass Instruments BPX5 column (15 m × 0.25 mm) using amyl acetate as a lock mass.

---

<sup>1</sup> D. Swern, *Org. React.*, **1953**, VII, 392.

### (*RS*)-3-Bromocyclohex-1-ene **7**

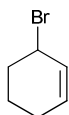

AIBN (cat.) and NBS (160 g, 0.90 mol) were added sequentially to a stirred solution of cyclohexene (91.2 mL, 0.90 mol) in CCl<sub>4</sub> (1 L). The resulting suspension was heated at reflux (80 °C) for 1.5 h then cooled to 0 °C and filtered. The filtrate was concentrated *in vacuo* to give **7** as a brown oil (145 g, quant) which was used immediately without further purification;  $\delta_{\text{H}}$  (400 MHz, CDCl<sub>3</sub>) 1.68-1.75 (1H, m), 1.91-2.25 (5H, m), 4.85-4.90 (1H, m, C(3)*H*), 5.80-5.85 (1H, m, C(2)*H*), 5.87-5.93 (1H, m, C(1)*H*).

### (*RS*)-3-*N*-Benzylaminocyclohex-1-ene **8**

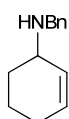

Benzylamine (241 g, 2.25 mmol) and K<sub>2</sub>CO<sub>3</sub> (149 g, 1.08 mmol) were added sequentially to a stirred solution of **7** (145 g, 0.90 mmol) in THF (50 mL) at 0 °C. The resulting mixture was stirred for 3 days at 50 °C after which time the mixture was allowed to cool to rt and Et<sub>2</sub>O (500 mL) was added. The mixture was washed with H<sub>2</sub>O (3 × 1 L) and the organic layer was dried and concentrated *in vacuo*. Purification by flash column chromatography (eluent 30-40 °C petrol) gave **8** as a colourless oil (80.1 g, 48%);  $\delta_{\text{H}}$  (400 MHz, CDCl<sub>3</sub>) 1.35-1.61 (2H, m), 1.71-1.81 (1H, m), 1.85-2.06 (3H, m), 3.21-3.29 (1H, m, C(3)*H*), 3.79-3.89 (2H, m, NCH<sub>2</sub>Ph), 5.61-5.82 (2H, m, C(1)*H*, C(2)*H*), 7.21-7.49 (5H, m, *Ph*).

### (*RS*)-3-*N,N*-Dibenzylaminocyclohex-1-ene **9**

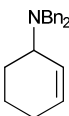

*Method A:* Dibenzylamine (29.8 mL, 0.16 mmol) and K<sub>2</sub>CO<sub>3</sub> (10.3 g, 0.07 mmol) were added sequentially to a stirred solution of **7** (7.14 mL, 0.06 mmol) in THF (50 mL) at 0 °C. The resulting mixture was stirred for 3 days at 50 °C after which time the mixture was allowed to cool to rt and Et<sub>2</sub>O (500 mL) was added. The mixture washed with H<sub>2</sub>O (3 × 1 L) and the organic layer was dried and concentrated *in vacuo*. Purification by flash column chromatography (eluent 30-40 °C petrol) gave **9** as a colourless oil (7.0 g, 41%);  $\delta_{\text{H}}$  (400 MHz, CDCl<sub>3</sub>) 1.78-1.99 (2H, m, C(5)*H*<sub>2</sub>), 2.19-2.49 (4H, m, C(4)*H*<sub>2</sub>, C(6)*H*<sub>2</sub>), 3.41 (2H, d, *J* 13.9, N(CH<sub>A</sub>H<sub>B</sub>Ph)<sub>2</sub>), (2H, d, *J* 13.9, N(CH<sub>A</sub>H<sub>B</sub>Ph)<sub>2</sub>), 3.98-4.13 (1H, m, C(3)*H*), 5.65-5.85 (2H, m, C(1)*H*, C(2)*H*), 7.11-7.49 (10H, m, *Ph*).

*Method B:* Benzyl bromide (50.9 mL, 428 mmol), Hünig's base (82 mL, 471 mmol) and DMAP (cat.) were added sequentially to a stirred solution of **8** (86.1 g, 428 mmol) in DCM (500 mL). The resulting mixture was stirred for 24 h at rt after which time sat. aq. NaHCO<sub>3</sub> (500 mL) was added and the mixture was extracted with DCM (3 × 500 mL). The combined organic extracts were washed sequentially with 10% aq. CuSO<sub>4</sub> (3 × 500 mL), H<sub>2</sub>O (3 × 500 mL) and 3 M aq. HCl (3 × 500 mL). 2 M aq. NaOH was added to the aqueous layer until pH >9 was achieved, and the mixture was then extracted with DCM (3 × 500 mL). The combined organic layers were dried and concentrated *in vacuo* to give **9** as colourless oil (83 g, 70%).

### General procedure for ammonium directed dihydroxylation

The requisite acid was added to a stirred solution of the requisite allylic amine in DCM, and the resultant solution was stirred at rt for 5 min. Freshly titrated *m*CPBA was then added and the solution was stirred at rt for 21 h. The mixture was then diluted with DCM and washed with sat. aq. Na<sub>2</sub>SO<sub>3</sub> until starch-iodide paper indicated that no *m*CPBA was present. The organic layer was washed four times with 0.1 M aq. NaHCO<sub>3</sub>, dried and concentrated *in vacuo*.

### (1*RS*,2*RS*,3*RS*)-1-Trichloroacetyl-2-hydroxy-3-*N,N*-dibenzylaminocyclohexane **11**

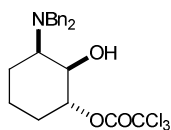

Following the *general procedure*, Cl<sub>3</sub>CCO<sub>2</sub>H (294 mg, 1.81 mmol), **9** (100 mg, 0.36 mmol) in DCM (1 mL), and *m*CPBA (81%, 122 mg, 0.58 mmol) gave **11** as colourless oil (165 mg, quant, 90% de);  $\nu_{\max}$  (film) 3424 (O–H), 2941 (C–H), 1762 (C=O);  $\delta_{\text{H}}$  (400 MHz, CDCl<sub>3</sub>) 1.50-1.97 (6H, m, C(4)H<sub>2</sub>, C(5)H<sub>2</sub>, C(6)H<sub>2</sub>), 2.91 (1H, br s, OH), 2.99-3.08 (1H, m, C(3)H), 3.74 (1H, d, *J* 14.4, N(CH<sub>A</sub>H<sub>B</sub>Ph)<sub>2</sub>), 3.94 (1H, d, *J* 14.4, N(CH<sub>A</sub>H<sub>B</sub>Ph)<sub>2</sub>), 4.14-4.19 (1H, m, C(2)H), 5.14-5.20 (1H, m, C(1)H), 7.22-7.38 (10H, m, *Ph*);  $\delta_{\text{C}}$  (100 MHz, CDCl<sub>3</sub>) 19.8, 22.6, 24.2 (C(4), C(5), C(6)), 54.9 (N(CH<sub>2</sub>Ph)<sub>2</sub>), 57.5 (C(3)), 67.8 (C(2)), 77.9 (C(1)), 89.9 (CCl<sub>3</sub>), 127.0 (*p-Ph*), 128.5, 128.6 (*o-, m-Ph*), 139.8 (*i-Ph*), 161.0 (C=O); *m/z* (ESI<sup>+</sup>) 456 ([M+H]<sup>+</sup>, 100%); HRMS (ESI<sup>+</sup>) C<sub>22</sub>H<sub>25</sub><sup>35</sup>Cl<sub>3</sub>NO<sub>3</sub><sup>+</sup> ([M+H]<sup>+</sup>) requires 456.0895; found 456.0891.

### Rate studies of the ammonium directed dihydroxylation reaction

A solution of **9** (15 mg, 0.054 mmol) in CDCl<sub>3</sub> (0.15 mL) was prepared in a 3 mm NMR tube. Cl<sub>3</sub>CCO<sub>2</sub>H (44 mg, 0.27 mmol) was added and the tube was shaken for 5 min. *m*CPBA (87% by wt, 17 mg, 0.087 mmol) was then added, and the progress of the reaction was monitored by <sup>1</sup>H NMR spectroscopic analysis.

## X-ray crystal structure determination for **12**

Data were collected using an Enraf-Nonius  $\kappa$ -CCD diffractometer with graphite monochromated Mo- $K\alpha$  radiation using standard procedures at 150 K. The structure was solved by direct methods (SIR92); all non-hydrogen atoms were refined with anisotropic thermal parameters. Hydrogen atoms were added at idealised positions. The structure was refined using CRYSTALS.<sup>2</sup>

X-ray crystal structure data for **12** [C<sub>17.5</sub>H<sub>18</sub>Cl<sub>6.67</sub>N<sub>0.67</sub>O<sub>4.67</sub>]:  $M = 548.69$ , monoclinic, space group  $C 1 2/c 1$ ,  $a = 24.5125(2) \text{ \AA}$ ,  $b = 9.82110(10) \text{ \AA}$ ,  $c = 30.9595(4) \text{ \AA}$ ,  $\beta = 106.7096(5)^\circ$ ,  $V = 7138.47(13) \text{ \AA}^3$ ,  $Z = 12$ ,  $\mu = 0.823 \text{ mm}^{-1}$ , colourless plate, crystal dimensions =  $0.2 \times 0.2 \times 0.3 \text{ mm}^3$ . A total of 7984 unique reflections were measured for  $5 < \theta < 27$  and 5826 reflections were used in the refinement. The final parameters were  $wR_2 = 0.095$  and  $R_1 = 0.092 [I > 3\sigma(I)]$ .

Crystallographic data (excluding structure factors) has been deposited with the Cambridge Crystallographic Data Centre as supplementary publication number CCDC 679350. Copies of the data can be obtained, free of charge, on application to CCDC, 12 Union Road, Cambridge CB2 1EZ, UK [fax: +44(0)-1223-336033 or e-mail: deposit@ccdc.cam.ac.uk].

## (1*RS*,2*RS*,3*RS*)-1-Dichloroacetoxy-2-hydroxy-3-*N,N*-dibenzylaminocyclohexane **13**

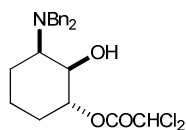

Following the *general procedure*, Cl<sub>2</sub>CHCO<sub>2</sub>H (0.15 mL, 1.81 mmol), **9** (100 mg, 0.36 mmol) in DCM (1 mL), and *m*CPBA (81%, 122 mg, 0.58 mmol) gave **13** as a colourless oil (152 mg, quant, 87% de);  $\nu_{\text{max}}$  (film) 3383 (O–H), 3075, 3062, 3027, 2940, 2869, 2864 (C–H), 1758 (C=O);  $\delta_{\text{H}}$  (400 MHz, CDCl<sub>3</sub>) 1.40–2.40 (6H, m, C(4)*H*<sub>2</sub>, C(5)*H*<sub>2</sub>, C(6)*H*<sub>2</sub>), 2.95–3.04 (1H, m, C(3)*H*), 3.75 (2H, d,  $J$  14.3, N(CH<sub>A</sub>H<sub>B</sub>Ph)<sub>2</sub>), 3.90 (2H, d,  $J$  14.3, N(CH<sub>A</sub>H<sub>B</sub>Ph)<sub>2</sub>), 4.11 (1H, app t,  $J$  3.2, C(2)*H*), 5.14 (1H, app t,  $J$  3.2 C(1)*H*), 5.80 (1H, s, CHCl<sub>2</sub>), 7.22–7.52 (10H, m, *Ph*);  $\delta_{\text{C}}$  (100 MHz, CDCl<sub>3</sub>) 19.9, 22.8, 24.3 (C(4), C(5), C(6)), 54.9 (N(CH<sub>2</sub>Ph)<sub>2</sub>), 57.6 (C(3)), 64.4 (CHCl<sub>2</sub>), 67.7 (C(2)), 76.1 (C(1)), 127.0 (*p-Ph*), 128.4, 128.6 (*o-, m-Ph*), 139.9 (*i-Ph*), 163.5 (C=O);  $m/z$  (ESI<sup>+</sup>) 422 ([M+H]<sup>+</sup>, 100%); HRMS (ESI<sup>+</sup>) C<sub>22</sub>H<sub>26</sub><sup>35</sup>Cl<sub>2</sub>NO<sub>3</sub><sup>+</sup> ([M+H]<sup>+</sup>) requires 422.1284; found 422.1284.

<sup>2</sup> P. W. Betteridge, J. R. Carruthers, R. I. Cooper, C. K. Prout and D. J. Watkin, CRYSTALS, 2001, Issue 11, Chemical Crystallography Laboratory, University of Oxford, UK.

### (1*RS*,2*RS*,3*RS*)-1-Trifluoroacetoxy-2-hydroxy-3-*N,N*-dibenzylaminocyclohexane **14**

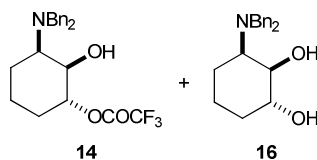

Following the *general procedure*, F<sub>3</sub>CCO<sub>2</sub>H (0.13 mL, 1.81 mmol), **9** (100 mg, 0.36 mmol) in DCM (1 mL), and *m*CPBA (81%, 122 mg, 0.58 mmol) gave a 53:47 mixture of **14** (90% de) and **16** (90% de) respectively (148 mg).

### (1*RS*,2*RS*,3*RS*)-1-*p*-Toluenesulphonyloxy-2-hydroxy-3-*N,N*-dibenzylaminocyclohexane **15**

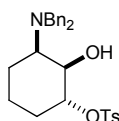

Following the *general procedure*, TsOH (206 mg, 1.08 mmol), **9** (100 mg, 0.36 mmol) in DCM (1 mL), and *m*CPBA (87%, 117 mg, 0.58 mmol) gave **15** as a green oil (167 mg, quant, 90% de);  $\nu_{\max}$  (film) 3050 (O–H), 2946 (C–H);  $\delta_{\text{H}}$  (400 MHz, CDCl<sub>3</sub>) 1.43-1.85 (6H, m, C(4)*H*<sub>2</sub>, C(5)*H*<sub>2</sub>, C(6)*H*<sub>2</sub>), 2.44 (3H, s, ArCH<sub>3</sub>), 2.92-3.13 (2H, br m, C(3)*H*, OH), 3.77 (4H, AB system, N(CH<sub>2</sub>Ph)<sub>2</sub>), 4.03-4.09 (1H, m, C(2)*H*), 4.75-4.79 (1H, m, C(1)*H*), 7.23-7.37 (12H, m, Ar, Ph), 7.75-7.81 (2H, d, *J* 7.8, Ar);  $\delta_{\text{C}}$  (100 MHz, CDCl<sub>3</sub>) 19.2 (CH<sub>2</sub>), 21.7 (ArCH<sub>3</sub>), 23.4, 25.1 (CH<sub>2</sub>), 54.6 (N(CH<sub>2</sub>Ph)<sub>2</sub>), 58.4 (C(3)), 67.4 (C(2)), 80.1 (C(1)), 127.0, 127.8, 128.5, 128.6, 129.9, 133.9, 139.8, 144.8 (Ar, Ph); *m/z* (ESI<sup>+</sup>) 466 ([M+H]<sup>+</sup>, 100%); HRMS (ESI<sup>+</sup>) C<sub>27</sub>H<sub>32</sub>NO<sub>4</sub>S<sup>+</sup> ([M+H]<sup>+</sup>) requires 466.2047; found 466.2045.

### (1*RS*,2*RS*,3*RS*)-3-*N,N*-Dibenzylaminocyclohexane-1,2-diol **16**

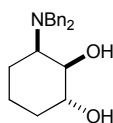

K<sub>2</sub>CO<sub>3</sub> (500 mg) was added to a stirred solution of **11** (164 mg, 0.36 mmol) in MeOH (5 mL), and the resultant suspension was stirred at rt for 16 h then concentrated *in vacuo*. H<sub>2</sub>O (10 mL) was added and the mixture was extracted with DCM (4 × 10 mL). The combined organic extracts were then washed with brine (50 mL), dried and concentrated *in vacuo*. Purification *via* flash column chromatography (gradient elution, eluent 0%→100% EtOAc in 40-60 °C petrol) gave **16** as a viscous, pale yellow oil (112 mg, quant, 90% de);  $\nu_{\max}$  (film) 3407 (O–H), 3027, 2937 (C–H);  $\delta_{\text{H}}$  (400 MHz, CDCl<sub>3</sub>) 1.43-1.89 (6H, m, C(4)*H*<sub>2</sub>, C(5)*H*<sub>2</sub>, C(6)*H*<sub>2</sub>), 2.14 (1H, br s, OH), 3.10-3.20 (1H, m, C(3)*H*), 3.69-3.78 (2H, d, *J* 14.4, N(CH<sub>A</sub>Ph)<sub>2</sub>), 3.81-3.91 (3H, m, C(2)*H*, N(CH<sub>B</sub>Ph)<sub>2</sub>), 3.99-4.06 (1H, m, C(1)*H*), 7.22-7.38 (10H, m, Ph);  $\delta_{\text{C}}$  (100 MHz, CDCl<sub>3</sub>) 19.9, 23.8, 28.1 (C(4), C(5), C(6)), 55.0 (N(CH<sub>2</sub>Ph)<sub>2</sub>), 58.3 (C(3)), 70.5 (C(1)), 71.1 (C(2)), 127.0 (*p*-Ph), 128.5,

128.7 (*o*-, *m*-Ph), 139.8 (*i*-Ph);  $m/z$  (ESI<sup>+</sup>) 312 ([M+H]<sup>+</sup>, 100%); HRMS (ESI<sup>+</sup>) C<sub>20</sub>H<sub>26</sub>NO<sub>2</sub><sup>+</sup> ([M+H]<sup>+</sup>) requires 312.1958; found 312.1952.

“One-pot” dihydroxylation protocol: Cl<sub>3</sub>CCO<sub>2</sub>H (29.5 g, 0.18 mol) was added to a stirred solution of **9** (10 g, 36 mmol) in DCM (100 mL) and the resultant solution was stirred at rt for 5 min. Freshly titrated *m*CPBA (87%, 11.5 g, 58 mmol) was then added and the solution was stirred at rt for 21 h. Sat. aq. Na<sub>2</sub>SO<sub>3</sub> was then added until starch-iodide paper indicated that no *m*CPBA was present. MeOH (500 mL) and K<sub>2</sub>CO<sub>3</sub> (10 g) were then added and the resultant suspension was stirred at rt for 16 h before being concentrated *in vacuo*. H<sub>2</sub>O (500 mL) was then added and the mixture was extracted with DCM (4 × 500 mL). The combined organic extracts were washed with brine (1 L), dried and concentrated *in vacuo* to give **16** as a viscous, pale yellow oil (11.4 g, quant, 90% de).

### (1*RS*,2*SR*,3*SR*)-1,2-Epoxy-3-*N,N*-dibenzylaminocyclohexane **17**

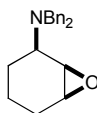

DBU (7.94 mL, 52.8 mmol) was added to a stirred solution of **15** (22.3 g, 49 mmol, 90% de) in DCM (100 mL) at rt and the reaction mixture was stirred for 24 h. 10% aq. CuSO<sub>4</sub> (500 mL) was added and the mixture was extracted with DCM (3 × 500 mL). The combined organic extracts were washed with H<sub>2</sub>O (3 × 500 mL), dried and concentrated *in vacuo*. Purification *via* flash column chromatography (gradient elution, eluent 0%→100% Et<sub>2</sub>O in 40-60 °C petrol) gave **17** as a colourless oil (13.6 g, 95%, >98% de);  $v_{\max}$  (film) 3061, 2938 (C–H);  $\delta_{\text{H}}$  (400 MHz, CDCl<sub>3</sub>) 1.11-1.39 (1H, m, C(5)*H*<sub>A</sub>), 1.55-1.96 (5H, m, C(4)*H*<sub>2</sub>, C(5)*H*<sub>B</sub>, C(6)*H*<sub>2</sub>), 3.00-3.10 (1H, m, C(3)*H*), 3.11-3.17 (1H, m, C(1)*H*), 3.37 (1H, app d, *J* 4.0, C(2)*H*), 3.75 (2H, d, *J* 14.1, N(CH<sub>A</sub>*H*<sub>B</sub>Ph)<sub>2</sub>), 3.96 (2H, d, *J* 14.1, N(CH<sub>A</sub>*H*<sub>B</sub>Ph)<sub>2</sub>), 7.24-7.53 (10H, m, *Ph*);  $\delta_{\text{C}}$  (100 MHz, CDCl<sub>3</sub>) 19.3, 21.6, 23.1 (C(4), C(5), C(6)), 51.7 (C(1)), 54.7 (N(CH<sub>2</sub>Ph)<sub>2</sub>), 55.0 (C(2)), 55.7 (C(3)), 126.7 (*p*-Ph), 128.2, 128.6 (*o*-, *m*-Ph), 140.7 (*i*-Ph);  $m/z$  (ESI<sup>+</sup>) 294 ([M+H]<sup>+</sup>, 100%); HRMS (ESI<sup>+</sup>) C<sub>20</sub>H<sub>24</sub>NO<sup>+</sup> ([M+H]<sup>+</sup>) requires 294.1852; found 294.1853.

### (1*RS*,2*RS*,3*RS*)-1-Trichloroacetyl-2-hydroxy-3-*N,N*-dibenzylaminocyclohexane **11** from ring-opening of epoxide **17**

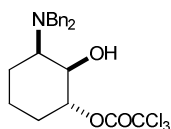

Cl<sub>3</sub>CCO<sub>2</sub>H (171 mg, 1.05 mmol) was added to a stirred solution of **17** (61 mg, 0.21 mmol) in DCM (2 mL) and the reaction mixture was stirred at rt for 16 h. 0.1 M aq. NaHCO<sub>3</sub> (5 mL) was then added and the

aqueous layer was extracted with DCM (3 × 5 mL). The combined organic extracts were washed with 0.1 M aq. NaHCO<sub>3</sub> (5 × 10 mL), dried and concentrated *in vacuo* to give **11** as a colourless oil (96 mg, quant, >98% de).

### (1*RS*,2*RS*,3*RS*)-1-Trifluoroacetyl-2-hydroxy-3-*N,N*-dibenzylaminocyclohexane **14** from ring-opening of epoxide **17**

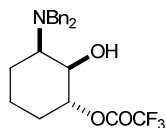

F<sub>3</sub>CCO<sub>2</sub>H (57 μL, 1.05 mmol) was added to a stirred solution of **17** (45 mg, 0.15 mmol) in DCM (1 mL) and the reaction mixture was stirred at rt for 16 h. 0.1 M aq. NaHCO<sub>3</sub> (5 mL) was then added and the aqueous layer was extracted with DCM (3 × 5 mL). The combined organic extracts were washed with 0.1 M aq. NaHCO<sub>3</sub> (5 × 10 mL), dried and concentrated *in vacuo* to give **14** as a white solid (63 mg, quant, >98% de); mp 89-90 °C;  $\nu_{\max}$  (KBr) 3405 (O–H), 3086, 3063, 3028, 2943, 2871, 2804 (C–H), 1781 (C=O);  $\delta_{\text{H}}$  (400 MHz, CDCl<sub>3</sub>) 1.42-1.97 (6H, m, C(4)H<sub>2</sub>, C(5)H<sub>2</sub>, C(6)H<sub>2</sub>), 2.92-3.09 (2H, m, C(3)H, OH), 3.74 (2H, d, *J* 16.0, N(CH<sub>A</sub>H<sub>B</sub>Ph)<sub>2</sub>), 3.88 (2H, d, *J* 16.0, N(CH<sub>A</sub>H<sub>B</sub>Ph)<sub>2</sub>), 4.00-4.10 (1H, m, C(2)H), 5.20-5.26 (1H, m, C(1)H), 7.21-7.39 (10H, m, *Ph*);  $\delta_{\text{C}}$  (100 MHz, CDCl<sub>3</sub>) 19.7, 23.0, 24.3 (C(4), C(5), C(6)), 54.8 (N(CH<sub>2</sub>Ph)<sub>2</sub>), 57.8 (C(3)), 67.2 (C(2)), 77.0 (C(1)), 114.5 (q, *J*<sub>CF</sub> 286, CF<sub>3</sub>), 127.1 (*p-Ph*), 128.5, 128.6 (*o-, m-Ph*), 139.6 (*i-Ph*), 156.5 (q, *J*<sub>CF</sub> 43, C=O); *m/z* (ESI<sup>+</sup>) 408 ([M+H]<sup>+</sup>, 100%); HRMS (ESI<sup>+</sup>) C<sub>22</sub>H<sub>25</sub>F<sub>3</sub>NO<sub>3</sub><sup>+</sup> ([M+H]<sup>+</sup>) requires 408.1781; found 408.1772.

### (1*RS*,2*RS*,3*RS*)-1-*p*-Toluenesulphonyloxy-2-hydroxy-3-*N,N*-dibenzylaminocyclohexane **15** from ring-opening of epoxide **17**

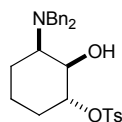

TsOH (324 mg, 1.71 mmol) was added to a stirred solution of **17** (100 mg, 0.34 mmol) in DCM (2 mL) and the reaction mixture was stirred at rt for 16 h. 0.1 M aq. NaHCO<sub>3</sub> (5 mL) was then added and the aqueous layer was extracted with DCM (3 × 5 mL). The combined organic extracts were washed with 0.1 M aq. NaHCO<sub>3</sub> (5 × 10 mL), dried and concentrated *in vacuo* to give **15** as a colourless oil (119 mg, 86%, >98% de).

**(1*RS*,2*RS*,3*RS*,5*SR*)-3-*N,N*-Dibenzylamino-5-*tert*-butyl-cyclohexane-1,2-diol **23****

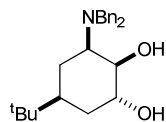

$\text{Cl}_3\text{CCO}_2\text{H}$  (44 mg, 0.27 mmol) was added to a solution of *syn*-**21** (13 mg, 0.039 mmol) in  $\text{CDCl}_3$  (0.15 mL) in a 3mm NMR tube. After 5 min, *m*CPBA (87% by wt, 17 mg, 0.086 mmol) was added and the progress of the reaction monitored by  $^1\text{H}$  NMR spectroscopy. After completion the reaction mixture was transferred to a round bottom flask and sat. aq.  $\text{Na}_2\text{SO}_3$  was added until starch-iodide paper indicated that no *m*CPBA remained. MeOH (1 mL) and  $\text{K}_2\text{CO}_3$  (50 mg) were added and the suspension stirred for 24 h before being concentrated *in vacuo*.  $\text{H}_2\text{O}$  (2 mL) was added and the mixture was extracted with DCM ( $4 \times 2$  mL). The combined organic extracts were washed with brine (10 mL), dried, and concentrated *in vacuo* to give **23** as a colourless oil (14 mg, quant, >95% de);  $\nu_{\text{max}}$  (film) 3376 (O–H), 3085, 3063, 3028, 2950, 2689 (C–H);  $\delta_{\text{H}}$  (400 MHz,  $\text{CDCl}_3$ ) 0.81 (9H, s,  $\text{CMe}_3$ ), 1.06-1.17 (1H, app q,  $J$  12.1, C(4) $H_{\text{ax}}$ ), 1.40 (1H, br tt,  $J$  12.3, 2.8, C(5) $H$ ), 1.50 (1H, td,  $J$  13.0, 2.8, C(6) $H_{\text{ax}}$ ), 1.59-1.66 (1H, m, C(6) $H_{\text{eq}}$ ), 1.72-1.80 (1H, m, C(4) $H_{\text{eq}}$ ), 3.06 (1H, br dt,  $J$  12.1, 3.0, C(3) $H$ ), 3.77 (2H, d,  $J$  16.0, N( $\text{CH}_A\text{H}_B\text{Ph}$ ) $_2$ ), 3.87 (2H, d,  $J$  16.0 N( $\text{CH}_A\text{H}_B\text{Ph}$ ) $_2$ ), 4.01 (1H, app br t,  $J$  2.5, C(2) $H$ ), 4.15 (1H, app q,  $J$  3.0, C(1) $H$ ), 7.19-7.40 (10H, m, *Ph*);  $\delta_{\text{C}}$  (100 MHz,  $\text{CDCl}_3$ ) 25.7 (C(4)), 27.4 ( $\text{CMe}_3$ ), 28.4 (C(6)), 32.2 ( $\text{CMe}_3$ ), 40.2 (C(5)), 54.9 (N( $\text{CH}_2\text{Ph}$ ) $_2$ ), 59.9 (C(3)), 69.3 (C(2)), 70.2 (C(1)), 126.9 (*p-Ph*), 128.4, 128.5 (*o-, m-Ph*), 139.2 (*i-Ph*);  $m/z$  (ESI $^+$ ) 368 ([M+H] $^+$ , 100%); HRMS (ESI $^+$ )  $\text{C}_{24}\text{H}_{34}\text{NO}_2^+$  ([M+H] $^+$ ) requires 368.2584; found 368.2584.

**(1*RS*,2*RS*,3*RS*,5*RS*)-3-*N,N*-Dibenzylamino-5-*tert*-butyl-cyclohexane-1,2-diol **25****

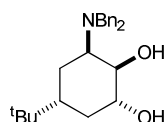

$\text{Cl}_3\text{CCO}_2\text{H}$  (44 mg, 0.27 mmol) was added to a solution of *anti*-**22** (18 mg, 0.054 mmol) in  $\text{CDCl}_3$  (0.15 mL) in a 3mm NMR tube. After 5 min, *m*CPBA (87% by wt, 17 mg, 0.086 mmol) was added and the progress of the reaction monitored by  $^1\text{H}$  NMR spectroscopy. After completion the reaction mixture was transferred to a round bottom flask and sat. aq.  $\text{Na}_2\text{SO}_3$  was added until starch-iodide paper indicated that no *m*CPBA remained. MeOH (1 mL) and  $\text{K}_2\text{CO}_3$  (50 mg) were added and the suspension stirred for 24 h before being concentrated *in vacuo*.  $\text{H}_2\text{O}$  (2 mL) was added and the mixture was extracted with DCM ( $4 \times 2$  mL). The combined organic extracts were washed with brine (10 mL), dried, and concentrated *in vacuo* to give a 22:78 mixture of **24:25** as a colourless oil (20 mg);  $\nu_{\text{max}}$  (film) 3354 (O–H), 3068, 3032, 2956, 2871 (C–H);  $m/z$  (ESI $^+$ ) 368 ([M+H] $^+$ , **25**, 100%), 350 ([M+H] $^+$ , **24**, 74%); HRMS (ESI $^+$ )  $\text{C}_{24}\text{H}_{34}\text{NO}_2^+$  ([M+H] $^+$ , **25**) requires 368.2584; found 368.2582.



Data for **24**:  $\delta_{\text{H}}$  (400 MHz,  $\text{CDCl}_3$ ) [selected peaks] 0.84 (9H, s,  $\text{CMe}_3$ ), 3.67 (2H, d,  $J$  12.0,  $\text{N}(\text{CH}_\text{A}\text{H}_\text{B}\text{Ph})_2$ ), 3.97 (2H, d,  $J$  12.0,  $\text{N}(\text{CH}_\text{A}\text{H}_\text{B}\text{Ph})_2$ ).

Data for **25**:  $\delta_{\text{H}}$  (400 MHz,  $\text{CDCl}_3$ ) 0.93 (9H, s,  $\text{CMe}_3$ ), 1.03 (1H, app q,  $J$  12.5,  $\text{C}(6)\text{H}_{\text{ax}}$ ), 1.17-1.37 (1H, m,  $\text{C}(4)\text{H}_{\text{ax}}$ ), 1.57 (1H, br tt,  $J$  12.9, 3.4,  $\text{C}(5)\text{H}$ ), 2.05 (1H, br ddd,  $J$  12.4, 6.8, 3.0,  $\text{C}(6)\text{H}_{\text{eq}}$ ), 2.15-2.23 (1H, m,  $\text{C}(4)\text{H}_{\text{eq}}$ ), 3.21 (1H, dd,  $J$  9.6, 7.3,  $\text{C}(2)\text{H}$ ), 3.33 (1H, app t,  $J$  6.6,  $\text{C}(3)\text{H}$ ), 3.43 (2H, d,  $J$  13.1,  $\text{N}(\text{CH}_\text{A}\text{H}_\text{B}\text{Ph})_2$ ), 3.85 (1H, ddd,  $J$  11.4, 9.6, 4.3,  $\text{C}(1)\text{H}$ ), 3.95 (2H, d,  $J$  13.1,  $\text{N}(\text{CH}_\text{A}\text{H}_\text{B}\text{Ph})_2$ ), 7.20-7.45 (10H, m,  $\text{Ph}$ );  $\delta_{\text{C}}$  (100 MHz,  $\text{CDCl}_3$ ) 23.5 ( $\text{C}(4)$ ), 27.3 ( $\text{CMe}_3$ ), 32.3 ( $\text{C}(6)$ ), 32.8 ( $\text{CMe}_3$ ), 43.0 ( $\text{C}(5)$ ), 56.1 ( $\text{C}(3)$ ), 56.4 ( $\text{N}(\text{CH}_2\text{Ph})_2$ ), 73.4 ( $\text{C}(1)$ ), 75.0 ( $\text{C}(2)$ ), 127.5 ( $p\text{-Ph}$ ), 128.6, 129.0 ( $o\text{-}, m\text{-Ph}$ ), 138.8 ( $i\text{-Ph}$ ).

### (1*RS*,2*RS*,3*RS*)-3-Aminocyclohexane-1,2-diol **35**

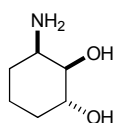

$\text{Pd}(\text{OH})_2/\text{C}$  (50 mg) was added to a vigorously stirred suspension of **16** (100 mg, 0.32 mmol) in degassed MeOH (1 mL) and the resultant suspension was stirred at rt under  $\text{H}_2$  (1 atm) for 24 h. The suspension was then filtered through a pad of Celite (eluent MeOH) and the filtrate was concentrated *in vacuo* to give **35** as a pale yellow solid (33 mg, 78%, 90% de); mp 115-116 °C;  $\nu_{\text{max}}$  (KBr) 3355 (O–H), 2936, 2867 (C–H);  $\delta_{\text{H}}$  (400 MHz,  $d_4\text{-MeOH}$ ) 1.34-1.46 (1H, m,  $\text{C}(6)\text{H}_\text{A}$ ), 1.47-1.66 (4H, m,  $\text{C}(4)\text{H}_2$ ,  $\text{C}(5)\text{H}_2$ ), 1.74-1.87 (1H, m,  $\text{C}(6)\text{H}_\text{B}$ ), 3.02-3.12 (1H, m,  $\text{C}(3)\text{H}$ ), 3.52 (1H, dd,  $J$  5.3, 3.3,  $\text{C}(2)\text{H}$ ), 3.74-3.82 (1H, m,  $\text{C}(1)\text{H}$ );  $\delta_{\text{C}}$  (100 MHz,  $d_4\text{-MeOH}$ ) 18.6, 29.2 ( $\text{C}(4)$ ,  $\text{C}(5)$ ,  $\text{C}(6)$ ), 49.9 ( $\text{C}(3)$ ), 70.0 ( $\text{C}(1)$ ), 74.2 ( $\text{C}(2)$ );  $m/z$  ( $\text{ESI}^+$ ) 132 ( $[\text{M}+\text{H}]^+$ , 100%); HRMS ( $\text{ESI}^+$ )  $\text{C}_6\text{H}_{14}\text{NO}_2^+$  ( $[\text{M}+\text{H}]^+$ ) requires 132.1019; found 132.1022.

### (1*RS*,2*RS*,3*RS*)-3-*N*-Benzylaminocyclohexane-1,2-diol **36**

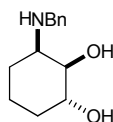

$\text{Cl}_3\text{CCO}_2\text{H}$  (4.37 g, 2.67 mmol) was added to a stirred solution of **8** (1.01 g, 5.39 mmol) in DCM (14.8 mL) and the resultant solution was stirred at rt for 5 min. Freshly titrated *m*CPBA (87%, 1.71 g, 8.62 mmol) was then added and the solution was stirred at rt for 21 h. Sat. aq.  $\text{Na}_2\text{SO}_3$  was then added until starch-iodide paper indicated that no *m*CPBA remained. MeOH (50 mL) and  $\text{K}_2\text{CO}_3$  (5 g) were then added and the resultant suspension was stirred at rt for 16 h before being concentrated *in vacuo*.  $\text{H}_2\text{O}$  (50 mL) was then added and the mixture was extracted with DCM (4  $\times$  100 mL). The combined organic extracts were washed with brine (100 mL), dried and concentrated *in vacuo*. Purification *via* flash column chromatography on neutral alumina (gradient elution, 0%  $\rightarrow$  100% MeOH in DCM) gave **36** as white solid (1.11 g, 94%, 90%

de); mp 150-151 °C;  $\nu_{\max}$  (film) 3500 (O-H), 3045, 2945, 3867 (C-H);  $\delta_{\text{H}}$  (400 MHz,  $d_4$ -MeOH) 1.45-1.90 (6H, m, C(4) $H_2$ , C(5) $H_2$ , C(6) $H_2$ ), 3.25-3.39 (1H, m, C(3) $H$ ), 3.83-4.04 (2H, m, C(1) $H$ , C(2) $H$ ), 4.05-4.15 (2H, m, NCH<sub>2</sub>Ph), 7.31-7.42 (3H, m, Ph), 7.44-7.51 (2H, m, Ph);  $\delta_{\text{C}}$  (100 MHz,  $d_4$ -MeOH) 18.3, 24.3, 27.6 (C(4), C(5), C(6)), 49.3 (NCH<sub>2</sub>Ph), 56.1 (C(3)), 68.8 (C(2)), 69.8 (C(1)), 128.9 (*p*-Ph), 129.1, 129.8 (*o*-, *m*-Ph), 133.9 (*i*-Ph);  $m/z$  (ESI<sup>+</sup>) 222 ([M+H]<sup>+</sup>, 100%); HRMS (ESI<sup>+</sup>) C<sub>13</sub>H<sub>20</sub>NO<sub>2</sub><sup>+</sup> ([M+H]<sup>+</sup>) requires 222.1489; found 222.1490.

### (1*RS*,2*RS*,3*RS*)-3-Aminocyclohexane-1,2-diol **35** from **36**

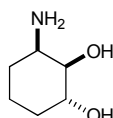

Pd(OH)<sub>2</sub>/C (131 mg) was added to a vigorously stirred suspension of **36** (262 mg, 1.19 mmol) in degassed MeOH (2 mL) and the resultant suspension was stirred at rt under H<sub>2</sub> (1 atm) for 24 h. The suspension was then filtered through a pad of Celite (eluent MeOH) and the filtrate was concentrated *in vacuo* to give **35** as a pale yellow solid (130 mg, 84%, 90% de).

### (1*RS*,2*RS*,3*RS*)-3-Aminocyclohexane-1,2-diol **35** from **37**

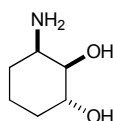

Cl<sub>3</sub>CCO<sub>2</sub>H (2.07 g, 12.7 mmol) was added to a stirred solution of **37** (500 mg, 2.54 mmol) in DCM (7 mL mL) and the resultant mixture was stirred at rt for 7 days. Concentration *in vacuo* of an aliquot gave **38** as a mixture with Cl<sub>3</sub>CCO<sub>2</sub>H;  $\delta_{\text{H}}$  (400 MHz, CDCl<sub>3</sub>) 1.62-2.18 (6H, m, C(4) $H_2$ , C(5) $H_2$ , C(6) $H_2$ ), 3.98-4.11 (1H, br m, C(3) $H$ ), 5.69-5.76 (1H, m, C(2) $H$ ), 6.09-6.17 (1H, m, C(1) $H$ ), 7.04-7.33 (3H, br s, NH<sub>3</sub>);  $\delta_{\text{H}}$  (100 MHz, CDCl<sub>3</sub>) 18.7, 24.3, 27.1 (C(4), C(5), C(6)), 48.4 (C(3)), 121.8 (C(2)), 136.0 (C(1)); HRMS (ESI<sup>+</sup>) C<sub>6</sub>H<sub>12</sub>N<sup>+</sup> ([M+H]<sup>+</sup>) requires 98.0964; found 98.0964.

*m*CPBA (87%, 806 mg, 4.06 mmol) was added to the reaction mixture and the resultant solution was stirred for 21 h at rt after which time sat. aq. Na<sub>2</sub>SO<sub>3</sub> was added until starch-iodide paper indicated that no *m*CPBA remained. MeOH (1 mL) and K<sub>2</sub>CO<sub>3</sub> (25 mg) were then added and the resultant suspension was stirred for 24 h at rt. The suspension was concentrated *in vacuo* and the residue filtered through basic alumina (eluent MeOH). The MeOH filtrate was concentrated *in vacuo* and 3 M aq. NaOH (5 drops) was added to the residue. DCM (2 mL) was added to the residue and then decanted to remove *m*CBA residues. This process was repeated five times. The residue was then dried *in vacuo* to give **35** as a pale yellow solid (114 mg, 34%, 90% de).
